# Supplementary material
Source: publisher figshare collection journal article supplement (https://tandf.figshare.com/ndownloader/files/18039071)
Supplement: Supplementary file 1 [file 18039071]

# The survival of interest groups: Evidence from Germany

Heike Klüver, *Humboldt-Universität zu Berlin*

## Online Appendix

Table A.1: Descriptive statistics

| <b>Variable</b>       | <b>N</b> | <b>Mean</b> | <b>Std. Dev.</b> | <b>Min</b> | <b>Max</b> |
|-----------------------|----------|-------------|------------------|------------|------------|
| Age                   | 1,699    | 45.114      | 34.967           | 1          | 188        |
| Cause groups          | 1,699    | 0.411       | 0.492            | 0          | 1          |
| Public salience       | 1,699    | 7.124       | 15.136           | 0          | 84.350     |
| Government activity   | 1,699    | 10652.920   | 19188.320        | 0          | 120898     |
| No of competitors     | 1,699    | 157.840     | 125.609          | 4          | 455        |
| No of new competitors | 1,699    | 0.109       | 0.312            | 0          | 1          |
| Reunification         | 1,699    | 0.599       | 0.490            | 0          | 1          |

Table A.2: Policy Areas

| <b>Policy Area</b>                                | <b>N</b>     | <b>%</b>      |
|---------------------------------------------------|--------------|---------------|
| Macroeconomics                                    | 190          | 11.18         |
| Civil Rights, Minority Issues and Civil Liberties | 74           | 4.36          |
| Health care                                       | 227          | 13.36         |
| Agriculture                                       | 62           | 3.65          |
| Labor, Employment and Immigration                 | 22           | 1.29          |
| Education                                         | 120          | 7.06          |
| Environment                                       | 70           | 4.12          |
| Energy                                            | 48           | 2.83          |
| Transportation                                    | 85           | 5.00          |
| Law, Crime and Family Issues                      | 68           | 4.00          |
| Social Welfare                                    | 101          | 5.94          |
| Community Development and Housing Issues          | 7            | 0.41          |
| Banking, Finance and Domestic Commerce            | 326          | 19.19         |
| Defense                                           | 21           | 1.24          |
| Space, Science, Technology and Communications     | 80           | 4.71          |
| Foreign Trade                                     | 9            | 0.53          |
| International Affairs and Foreign Aid             | 86           | 5.06          |
| Government Operations                             | 19           | 1.12          |
| Public Lands and Water Management                 | 5            | 0.29          |
| Reunification                                     | 2            | 0.12          |
| Media                                             | 53           | 3.12          |
| Other, Miscellaneous and Human Interest           | 24           | 1.41          |
| <b>Total</b>                                      | <b>1,699</b> | <b>100.00</b> |

Table A.3: Test of proportional-hazards assumption (Model 1)

| <b>Variable</b> | $\rho$ | $\chi^2$ | <b>Prob&gt;<math>\chi^2</math></b> |
|-----------------|--------|----------|------------------------------------|
| Cause group     | -0.090 | 2.74     | 0.098                              |
| Public salience | -0.008 | 0.01     | 0.904                              |
| Global test     |        | 2.74     | 0.254                              |

Table A.4: Test of proportional-hazards assumption (Model 2)

| <b>Variable</b>       | $\rho$ | $\chi^2$ | <b>Prob&gt;<math>\chi^2</math></b> |
|-----------------------|--------|----------|------------------------------------|
| Cause group           | -0.023 | 0.32     | 0.573                              |
| Public salience       | -0.080 | 2.01     | 0.156                              |
| Government activity   | -0.030 | 0.44     | 0.506                              |
| No of competitors     | -0.029 | 0.62     | 0.430                              |
| No of new competitors | 0.079  | 3.74     | 0.053                              |
| Global test           |        | 6.43     | 0.267                              |

Table A.5: Test of proportional-hazards assumption (Model 3)

| <b>Variable</b>       | $\rho$ | $\chi^2$ | <b>Prob&gt;<math>\chi^2</math></b> |
|-----------------------|--------|----------|------------------------------------|
| Cause group           | 0.011  | 0.05     | 0.817                              |
| Public salience       | -0.095 | 1.44     | 0.231                              |
| Government activity   | -0.057 | 0.87     | 0.351                              |
| No of competitors     | -0.102 | 5.11     | 0.024                              |
| No of new competitors | 0.128  | 10.73    | 0.001                              |
| Unification           | -0.115 | 6.80     | 0.009                              |
| Global test           |        | 13.79    | 0.032                              |

Table A.6: Cox Regression without groups that registered in 1974

|                               | <b>Model 4</b>       |
|-------------------------------|----------------------|
| <b>Main</b>                   |                      |
| Cause groups                  | 0.264**<br>(0.119)   |
| Public salience               | 0.011**<br>(0.006)   |
| Government activity           | 0.000<br>(0.000)     |
| No of competitors             | 0.002<br>(0.001)     |
| No of new competitors         | -1.295<br>(0.927)    |
| Reunification                 | 3.513<br>(2.212)     |
| <b>TVC x ln(t)</b>            |                      |
| Public salience x ln(t)       | -0.007***<br>(0.002) |
| No of competitors x ln(t)     | -0.000<br>(0.000)    |
| No of new competitors x ln(t) | 0.386<br>(0.252)     |
| Reunification                 | -0.302<br>(0.601)    |
| N                             | 19,040               |
| Subjects                      | 1,429                |
| Failures                      | 291                  |
| Log pseudolikelihood          | -1800                |

\*\*\* $p \leq 0.01$ , \*\* $p \leq 0.05$ , \* $p \leq 0.10$ ; Clustered robust standard errors in parentheses. The effect of public salience on interest group survival is at first negative, but after five years it becomes positive thus confirming the overall positive effect (see e.g. Box-Steffensmeier and Zorn 2001: 983)

Table A.7: Cox Regression controlling for umbrella status

|                       | <b>Model 5</b>       |
|-----------------------|----------------------|
| <b>Main</b>           |                      |
| Cause groups          | 0.531***<br>(0.160)  |
| Public salience       | -0.012***<br>(0.003) |
| Government activity   | 0.000<br>(0.000)     |
| No of competitors     | 0.001<br>(0.000)     |
| No of new competitors | -0.081<br>(0.123)    |
| Reunification         | 3.039***<br>(0.396)  |
| Umbrella association  | -0.462**<br>(0.202)  |
| N                     | 23,609               |
| Subjects              | 1,534                |
| Failures              | 238                  |
| Log pseudolikelihood  | -1460                |

\*\*\* $p \leq 0.01$ , \*\* $p \leq 0.05$ , \* $p \leq 0.10$ ; Clustered robust standard errors in parentheses

Table A.8: Results from Cox Regression with policy area and year fixed effects

|                       | <b>Model 6</b><br>Policy area fixed effects | <b>Model 7</b><br>Year fixed effects |
|-----------------------|---------------------------------------------|--------------------------------------|
| <b>Main</b>           |                                             |                                      |
| Cause groups          | 0.270*<br>(0.144)                           | 0.229*<br>(0.135)                    |
| Public salience       | 0.007<br>(0.005)                            | -0.004*<br>(0.002)                   |
| Government activity   | 0.000<br>(0.000)                            | -0.000<br>(0.000)                    |
| No of competitors     | 0.008***<br>(0.002)                         | 0.001<br>(0.001)                     |
| No of new competitors | -1.110<br>(0.838)                           | 0.005<br>(0.104)                     |
| Reunification         | 3.724*<br>(1.946)                           | 4.728*<br>(2.867)                    |
| N                     | 25,666                                      | 25,666                               |
| Subjects              | 1,699                                       | 1,699                                |
| Failures              | 339                                         | 339                                  |
| Log pseudolikelihood  | -2102                                       | -2032                                |

\*\*\* $p \leq 0.01$ , \*\* $p \leq 0.05$ , \* $p \leq 0.10$ ; Clustered robust standard errors in parentheses, TVCs not reported



Table A.9: Cox Regression controlling for mergers

|                       | <b>Model 8</b>       |
|-----------------------|----------------------|
| <b>Main</b>           |                      |
| Cause groups          | 0.848***<br>(0.298)  |
| Public salience       | -0.008***<br>(0.002) |
| Government activity   | -0.000<br>(0.000)    |
| No of competitors     | 0.001<br>(0.000)     |
| No of new competitors | -0.938<br>(0.748)    |
| Reunification         | 2.718***<br>(0.305)  |
| Mergers               | -0.459<br>(0.817)    |
| N                     | 25,666               |
| Subjects              | 1,699                |
| Failures              | 339                  |
| Log pseudolikelihood  | -2108                |

\*\*\* $p \leq 0.01$ , \*\* $p \leq 0.05$ , \* $p \leq 0.10$ ; Clustered robust standard errors in parentheses, TVCs not reported

Table A.10: Cox Regression incl. interaction  
between group type and salience

|                                | <b>Model 9</b>      |
|--------------------------------|---------------------|
| <b>Main</b>                    |                     |
| Cause groups                   | 0.387***<br>(0.115) |
| Public salience                | -0.005**<br>(0.002) |
| Cause groups * Public salience | -0.001<br>(0.009)   |
| N                              | 25,666              |
| Subjects                       | 1,699               |
| Failures                       | 339                 |
| Log pseudolikelihood           | -2249               |

\*\*\* $p \leq 0.01$ , \*\* $p \leq 0.05$ , \* $p \leq 0.10$ ;  
Clustered robust standard errors in  
parentheses

Table A.11: Distribution of total population and analysis sample

|                                                   | <b>Total Population</b> | <b>Analysis sample</b> |
|---------------------------------------------------|-------------------------|------------------------|
| <b>Group type</b>                                 |                         |                        |
| Cause groups                                      | 38.84                   | 41.08                  |
| Sectional groups                                  | 61.16                   | 58.92                  |
| <b>Umbrella association</b>                       |                         |                        |
| No                                                | 73.62                   | 75.49                  |
| Yes                                               | 26.38                   | 24.51                  |
| <b>Policy Domain</b>                              |                         |                        |
| Macroeconomics                                    | 12.99                   | 11.18                  |
| Civil Rights. Minority Issues and Civil Liberties | 3.63                    | 4.36                   |
| Health care                                       | 12.21                   | 13.36                  |
| Agriculture                                       | 4.47                    | 3.65                   |
| Labour. Employment and Immigration                | 1.55                    | 1.29                   |
| Education                                         | 7.30                    | 7.06                   |
| Environment                                       | 3.36                    | 4.12                   |
| Energy                                            | 2.36                    | 2.83                   |
| Transportation                                    | 5.91                    | 5.00                   |
| Law. Crime and Family Issues                      | 3.57                    | 4.00                   |
| Social Welfare                                    | 6.06                    | 5.94                   |
| Community Development and Housing Issues          | 0.34                    | 0.41                   |
| Banking. Finance and Domestic Commerce            | 20.29                   | 19.19                  |
| Defence                                           | 1.54                    | 1.24                   |
| Space. Science. Technology and Communications     | 3.77                    | 4.71                   |
| Foreign Trade                                     | 0.68                    | 0.53                   |
| International Affairs and Foreign Aid             | 3.92                    | 5.06                   |
| Government Operations                             | 1.03                    | 1.12                   |
| State and Local Government Administration         | 0.00                    | 0.00                   |
| Public Lands and Water Management                 | 0.24                    | 0.29                   |
| Reunification                                     | 0.16                    | 0.12                   |
| Media                                             | 3.17                    | 3.12                   |
| Other. Miscellaneous and Human Interest           | 1.45                    | 1.41                   |

Figure A.1: Public salience over time

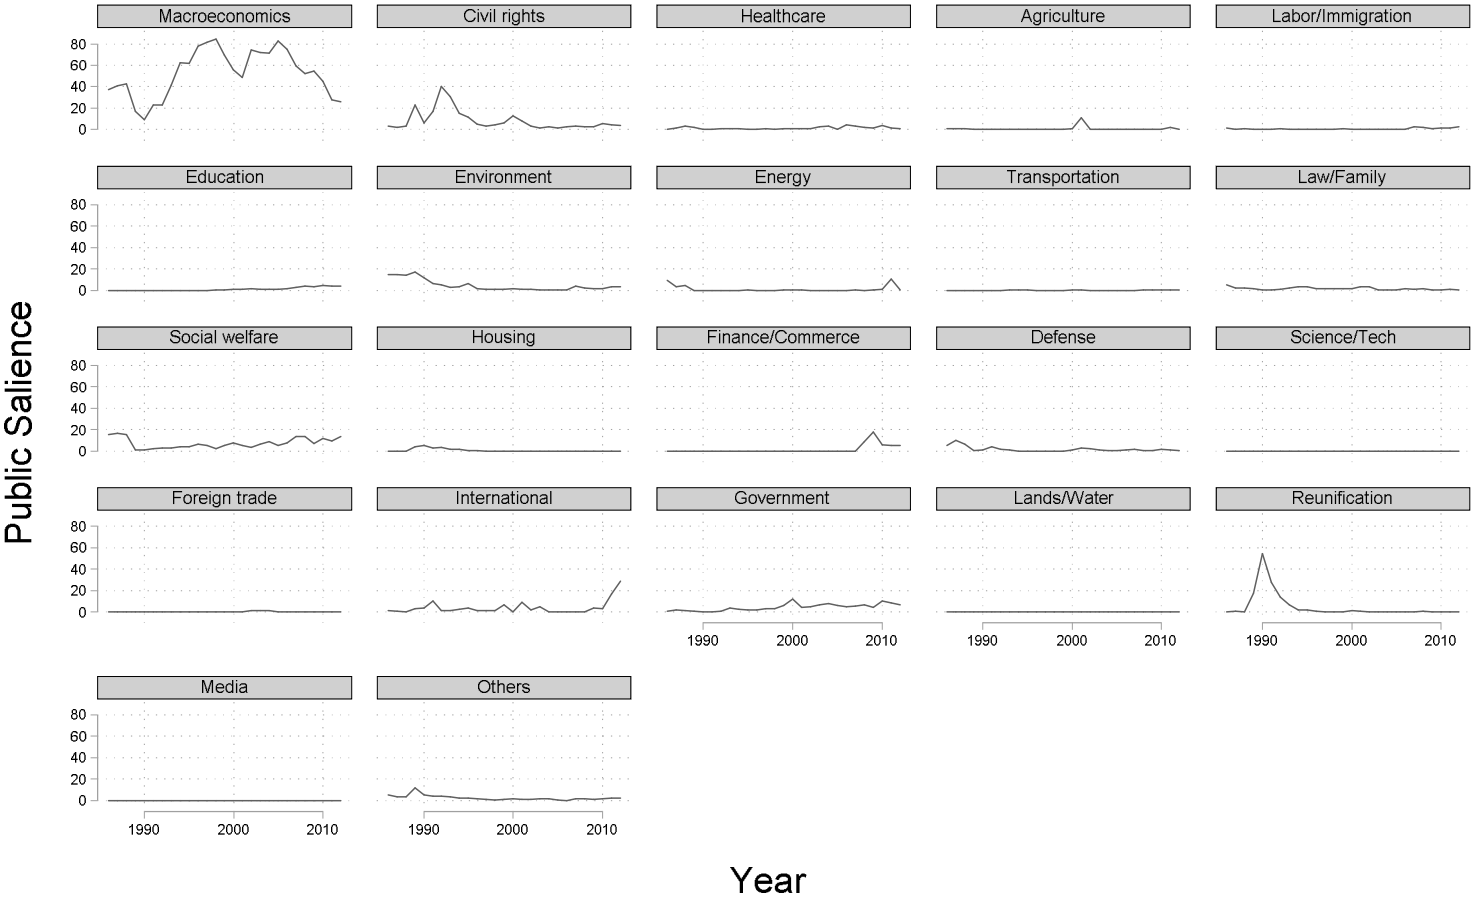

Graphs by Policy area

Figure A.2: The number of sectional and cause groups per policy area over time

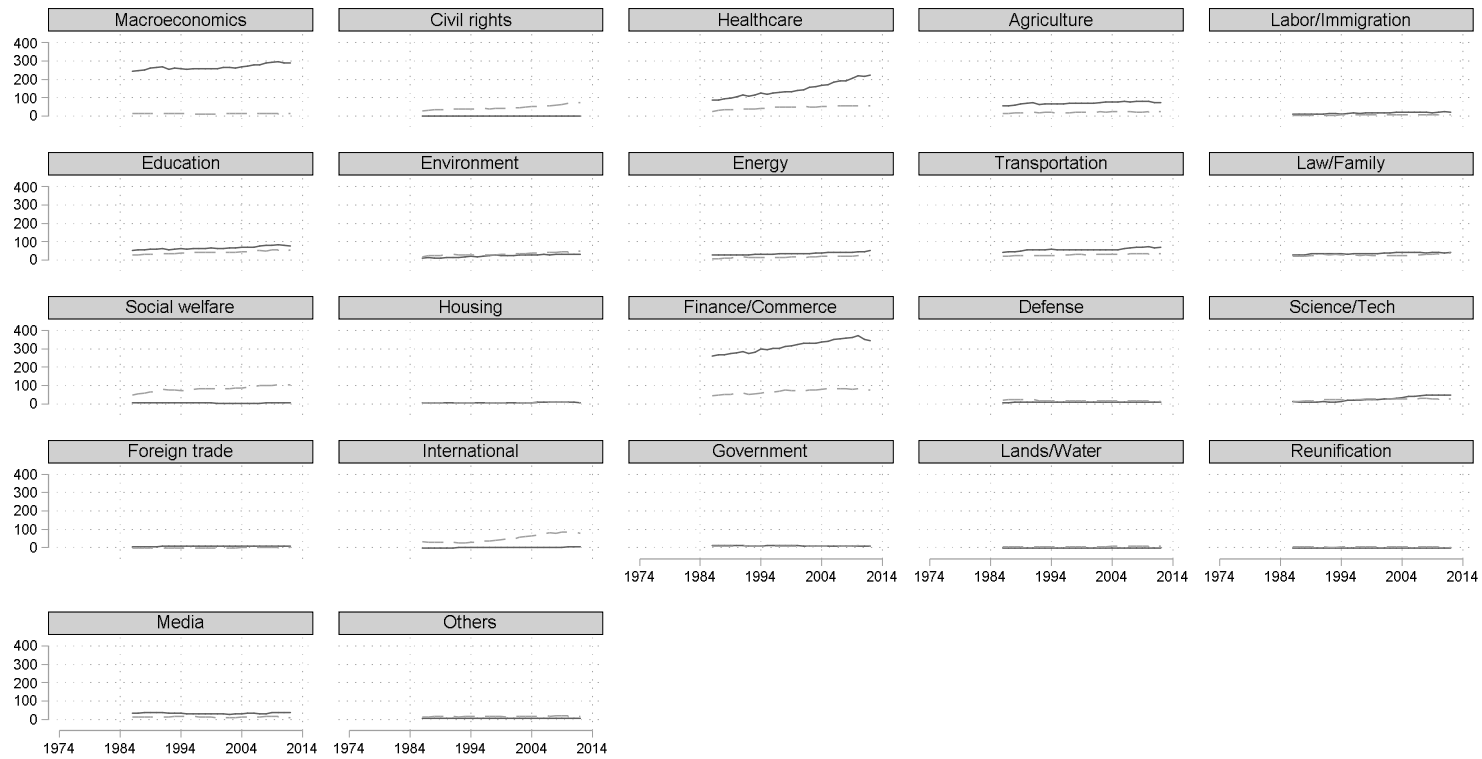

Year in which interest group registered at Bundestag

— Sectional groups    - - Cause groups

Graphs by Policy area
